# Supplementary material
Source: publisher figshare collection journal article supplement (https://acs.figshare.com/ndownloader/files/15222155)
Supplement: Supplementary file 1 [file 15222155]

## Supporting Information:

# Modulation of Cellular Colonization of Porous Polyurethane scaffolds via the control of pore interconnection size and nanoscale surface modifications

*G. Lutzweiler<sup>1,2,3\*</sup>, J. Barthes<sup>4</sup>, G. Koenig<sup>1,2</sup>, H. Kerdjoudj<sup>6</sup>, J. Mayingi<sup>5</sup>, F. Boulmedais<sup>3</sup>, P. Schaaf<sup>1,2\*</sup>, W. Drenckhan<sup>3</sup>, N.E. Vrana<sup>4\*</sup>*

\* NEV: e.vrana@protipmedical.com

\*PS: schaaf@unistra.fr

\*GL: glutzweiler@hotmail.fr

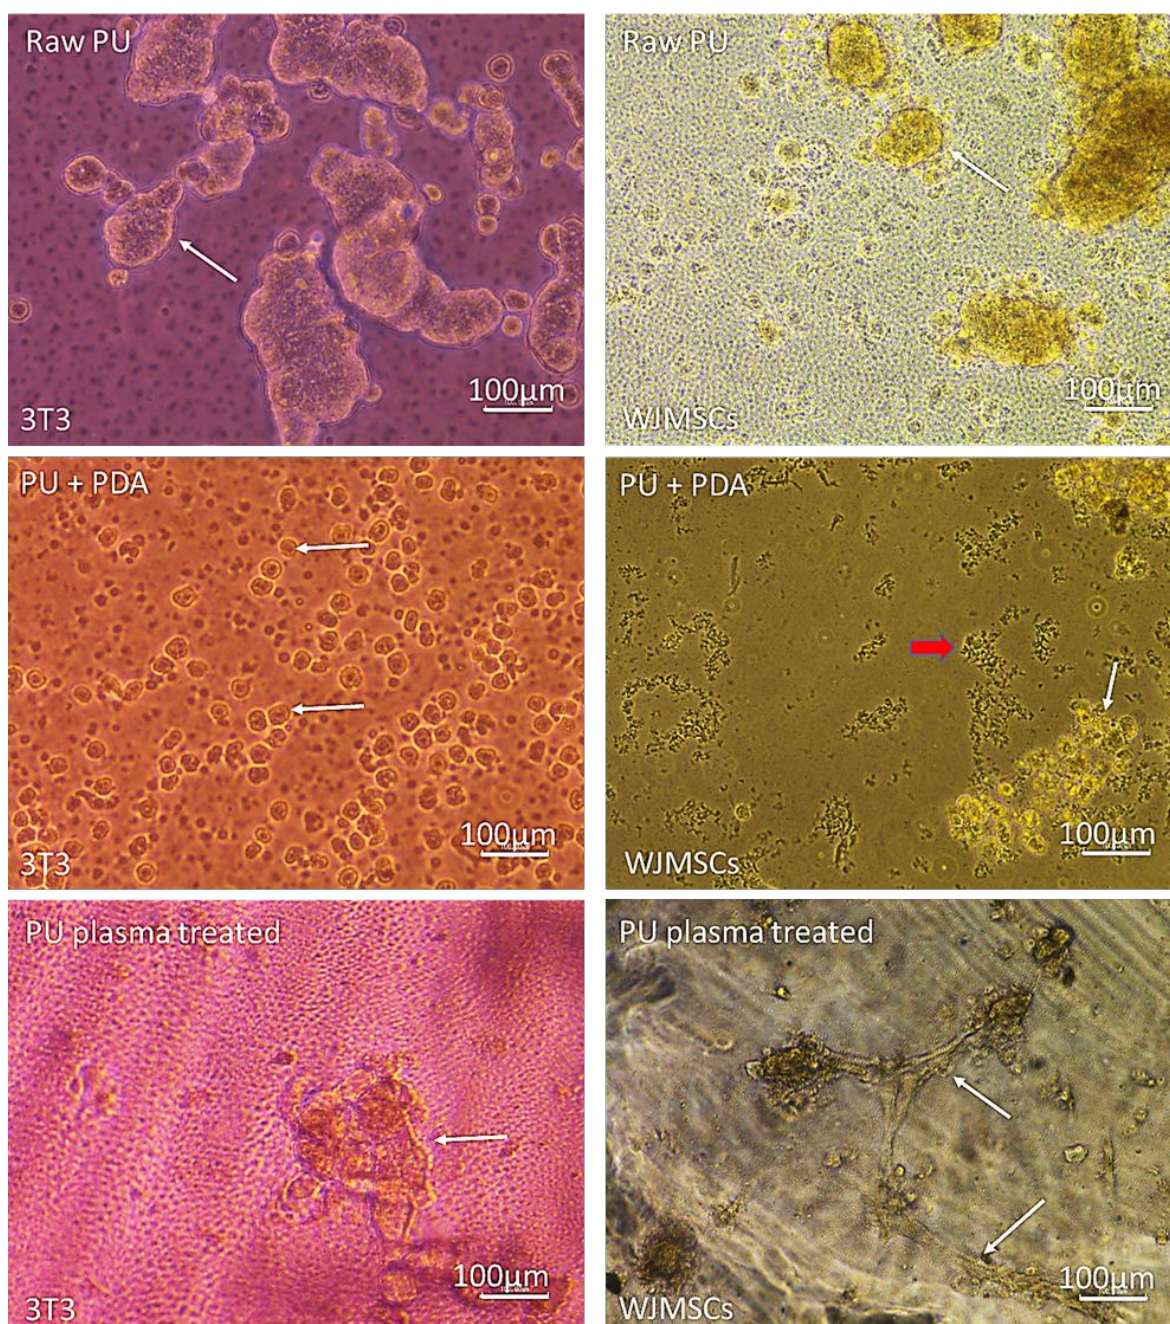

**Figure S 1:** Images taken with optical microscope of 3T3 Fibroblasts (left column) and WJMSCs (right column) on PU flat surfaces after 24h of culture. Cells were seeded on raw PU labelled as (Raw PU, top images), PDA-coated PU labelled as PU + PDA (images in the middle), and PU that underwent plasma treatment labelled PU plasma treated (images at the bottom)



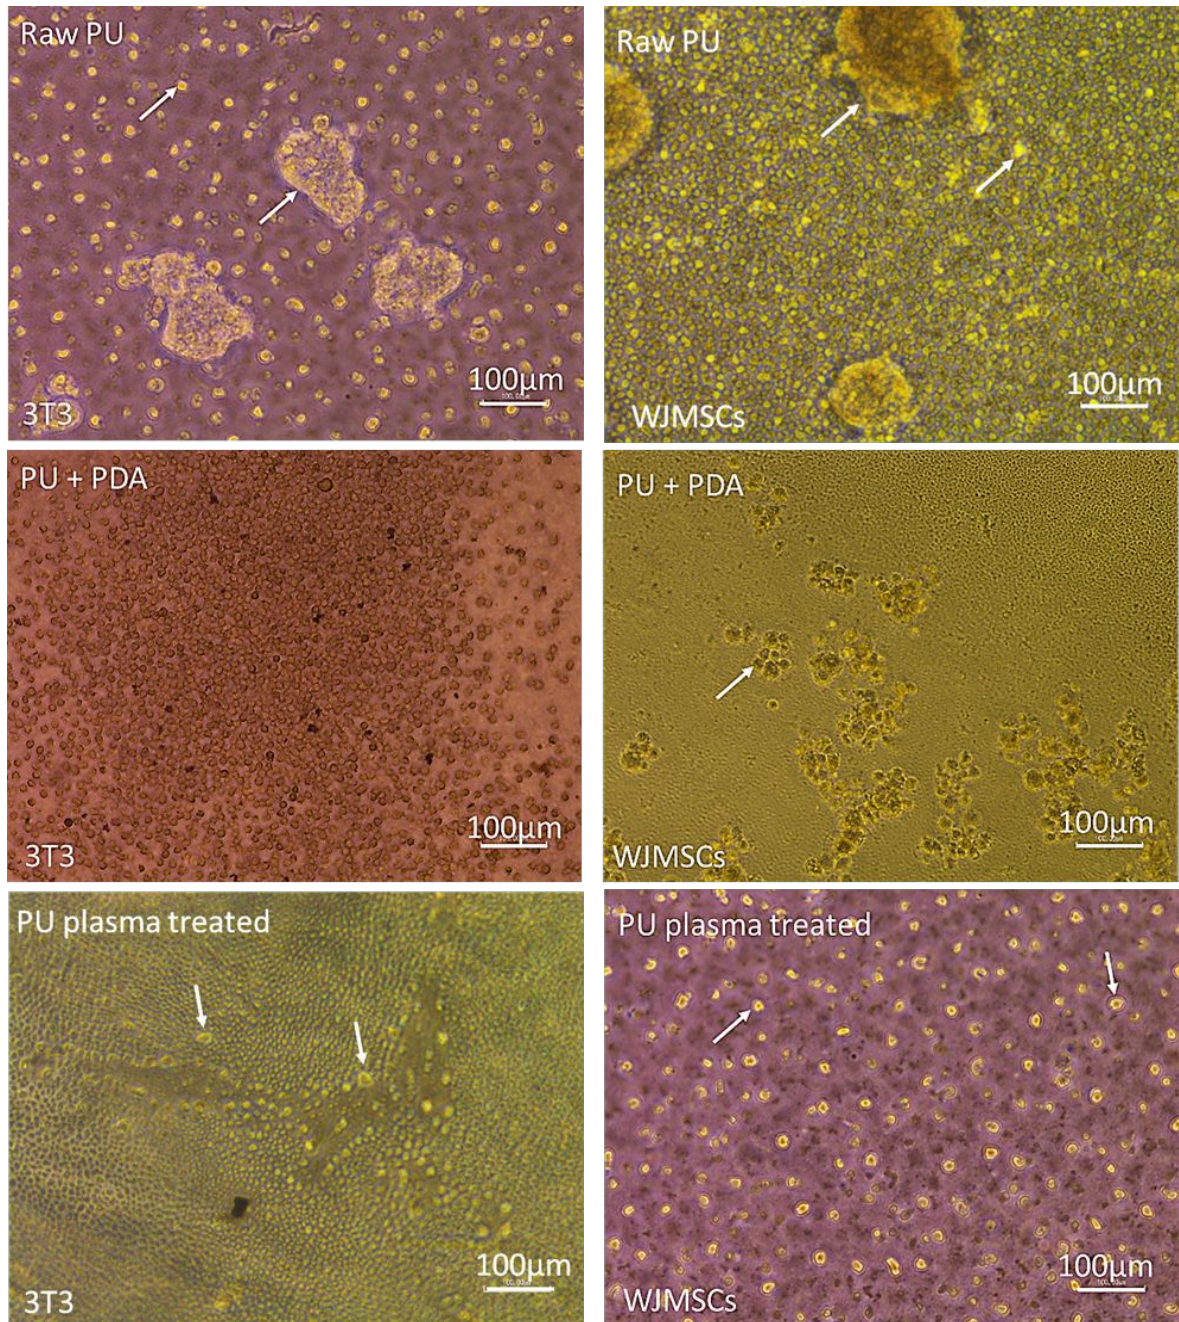

**Figure S 2:** Images taken with optical microscope of 3T3 Fibroblasts (left column) and WJMSCs (right column) on PU flat surfaces after 48h of culture. Cells were seeded on raw PU labelled as (Raw PU, top images), PDA-coated PU labelled as PU + PDA (images in the middle), and PU that underwent plasma treatment labelled PU plasma treated (images at the bottom)



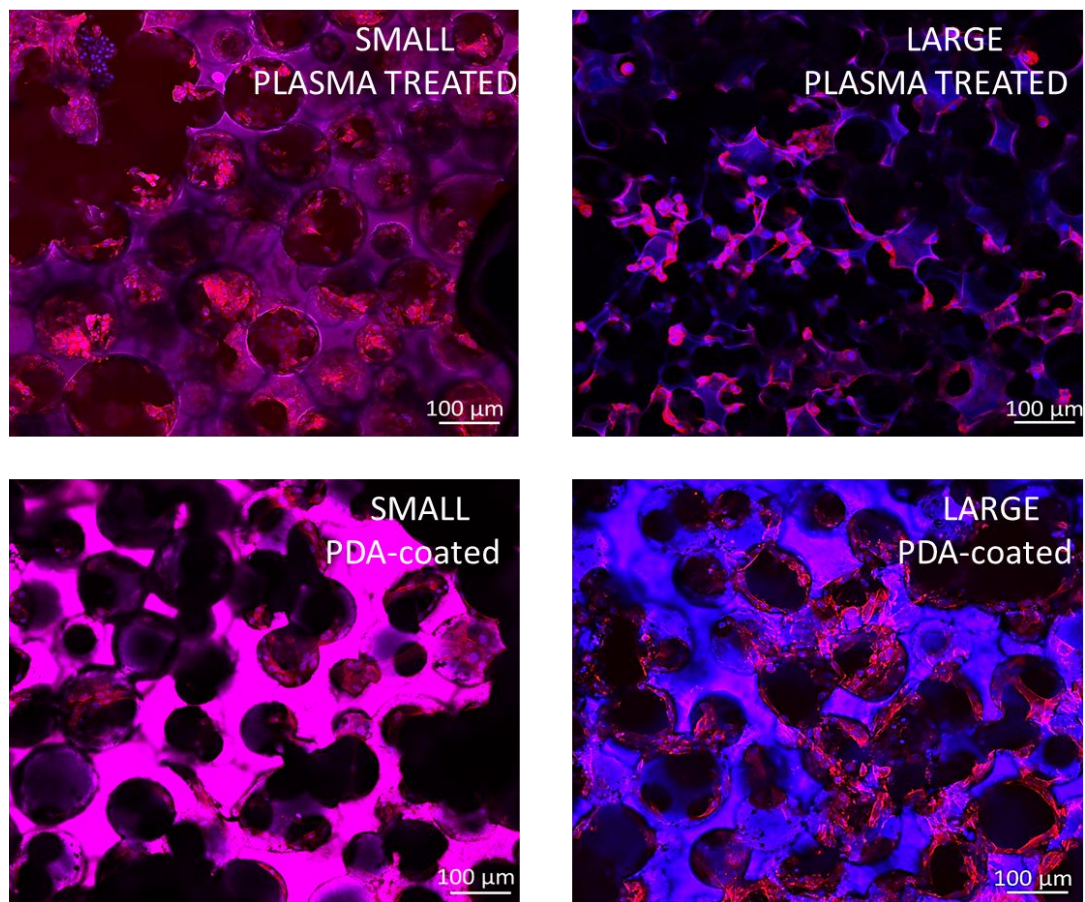

**Figure S-3:** confocal images of NIH 3T3 fibroblast in PU scaffolds after 24h of culture. Left column corresponds to scaffold having SMALL interconnections while in the right column, scaffolds have LARGE interconnections. Images on the top represent scaffolds that were treated with plasma prior seeding the cells, while images at the bottom represent scaffold that were coated with PDA. Cells were stained with DAPI/Phalloidin. Images were taken at the center of the scaffold approximately.

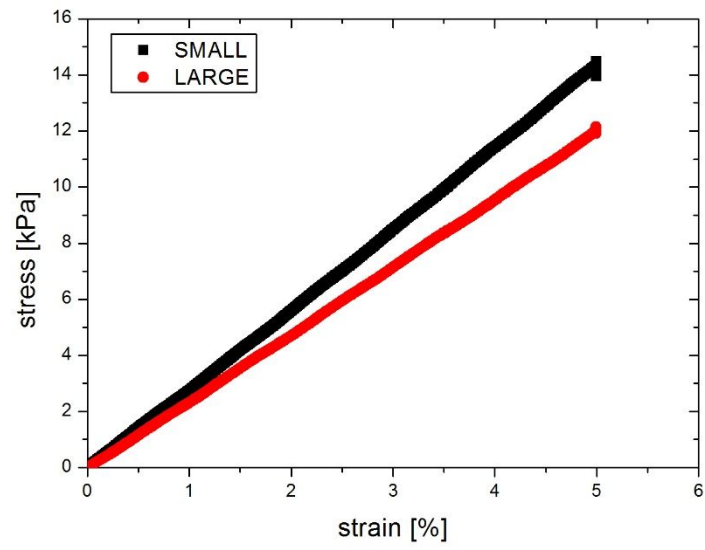

**Figure S-4:** Typical stress-strain curve of scaffold with both SMALL and LARGE interconnections.
